# Supplementary material for: Infusing behavior science into large language models for activity coaching
Source: PubMed Central journal article supplement (PMC10986996; doi:10.1371/journal.pdig.0000431), 2024-04-02
Supplement: pdig.0000431.s001.pdf [file pdig.0000431.s001.pdf]

| <b>Bleu Score</b>                                                 | <b>1-gram</b> | <b>2-gram</b> | <b>3-gram</b> | <b>4-gram</b> |
|-------------------------------------------------------------------|---------------|---------------|---------------|---------------|
| Non Primed                                                        | 7.31          | 4.24          | 2.57          | 1.78          |
| Primed using randomly selected 30 coach sentences from PACE study | 17.89         | 8.52          | 5             | 3.34          |
| Primed with coach crafted 30 sentences for PACE study             | 22.312        | 10.894        | 5.356         | 3.289         |

S1 Table : BLEU(BiLingual Evaluation Understudy) match score to compare LLM priming strategies to match human coach sentences.
