# Supplementary material for: Infusing behavior science into large language models for activity coaching
Source: PubMed Central journal article supplement (PMC10986996; doi:10.1371/journal.pdig.0000431), 2024-04-02
Supplement: pdig.0000431.s002.pdf [file pdig.0000431.s002.pdf]

| <b>In<br/>de<br/>x</b> | <b>Category</b>    | <b>User query</b>                                                                                                                  | <b>Days</b> |
|------------------------|--------------------|------------------------------------------------------------------------------------------------------------------------------------|-------------|
| 1                      | <b>Motivation</b>  | I was able to meet my goal of step count in yesterday's walk, but sometimes it is hard to meet the goal.                           | 7           |
| 2                      | <b>Motivation</b>  | I would be more inclined to go walking if it could be a bit more fun.                                                              | 5,8         |
| 3                      | <b>Motivation</b>  | I am busy today and not sure of all the benefits of daily walking on health and well-being.                                        | 2,4         |
| 4                      | <b>Capability</b>  | Hi coach, unfortunately I have injured myself. I can't walk today.                                                                 | 5,11        |
| 5                      | <b>Capability</b>  | I really don't think it is the best use of time. I just don't think it would be worth it.                                          | 9           |
| 6                      | <b>Capability</b>  | Hi coach, it is raining outside. I do not want to walk in the rain and I do not have a treadmill. Is there anything else I can do? | 6,2         |
| 7                      | <b>Opportunity</b> | I am super busy with work today.I have chores to do in the morning and work meetings after that.                                   | 1,7,5       |
| 8                      | <b>Opportunity</b> | Hi coach, sure but I am not able to get it in my routine. How can I plan better ?                                                  | 4,2,8       |
| 9                      | <b>Opportunity</b> | Hi Coach, 30 minutes would be a lot. Is there any other alternative you could suggest?                                             | 8,8         |

S2 Table : User queries across COM [Capability, Opportunity and Motivation] themes selected for Large Language Model evaluation. Days column represent the days when the query was asked by different users to coaches in the PACE study
