# Supplementary material for: Infusing behavior science into large language models for activity coaching
Source: PubMed Central journal article supplement (PMC10986996; doi:10.1371/journal.pdig.0000431), 2024-04-02
Supplement: pdig.0000431.s007.pdf [file pdig.0000431.s007.pdf]

| A     |                                                                                                                                                                                                                                                                                                | B     |                                                                                                                 |
|-------|------------------------------------------------------------------------------------------------------------------------------------------------------------------------------------------------------------------------------------------------------------------------------------------------|-------|-----------------------------------------------------------------------------------------------------------------|
| Coach | Hey John, It's time for your morning walk.                                                                                                                                                                                                                                                     | Coach | Hey John, It's time for your morning walk.                                                                      |
| Human | Hi Coach - Yes, it is. I would more inclined to go if it could be a bit more fun.                                                                                                                                                                                                              | Human | Hi Coach - Yes, it is. I would more inclined to go if it could be a bit more fun.                               |
| Coach | That's a great attitude, John! Let's see if we can make your walk more fun. Maybe you could walk through a park or by a river. Second, let's try listening to some music or an audio book while you walk. Finally, let's see if we can get a friend or family member to join you on your walk. | Coach | Well, let's make it more fun then! Why don't we listen to some music or a podcast that you enjoy while we walk? |
| Human | That sounds like a great plan! I'm going to go ask my wife if she wants to join me on my walk today. Thanks for the motivation, Coach!                                                                                                                                                         | Human | That could probably help. But I still get bored alone.                                                          |
|       |                                                                                                                                                                                                                                                                                                | Coach | How about we walk with a friend then?                                                                           |
|       |                                                                                                                                                                                                                                                                                                | Human | Maybe that could make walking less boring and more fun.                                                         |
|       |                                                                                                                                                                                                                                                                                                | Coach | Let's try it and see!                                                                                           |
|       |                                                                                                                                                                                                                                                                                                | Human | Thank you for the suggestion coach.                                                                             |
|       |                                                                                                                                                                                                                                                                                                | Coach | You're welcome! Let me know how it goes.                                                                        |

| ID | Question                                                                                                                   | A | B |
|----|----------------------------------------------------------------------------------------------------------------------------|---|---|
| 1  | Which conversation provides a better overall coaching experience - A, B or unsure                                          |   | B |
| 3  | The coach provides concrete fitness strategies that are actionable to the user (1 - strongly disagree → 5- strongly agree) | 5 | 5 |
| 4  | The coach responds to user questions in a realistic manner (1 - strongly disagree → 5- strongly agree)                     | 2 | 4 |
| 5  | The coach provides motivation or encouragement to the user (1 - strongly disagree → 5- strongly agree)                     | 4 | 4 |
| 6  | The coach is empathetic toward the user's needs and challenges (1 - strongly disagree → 5- strongly agree)                 | 4 | 4 |
| 7  | The language used by the coach is realistic and appropriate for the setting (1 - strongly disagree → 5- strongly agree)    | 2 | 4 |

S1 Fig : LLM Conversation rating tool used by annotators
