# Supplementary material for: Infusing behavior science into large language models for activity coaching
Source: PubMed Central journal article supplement (PMC10986996; doi:10.1371/journal.pdig.0000431), 2024-04-02
Supplement: pdig.0000431.s008.pdf [file pdig.0000431.s008.pdf]

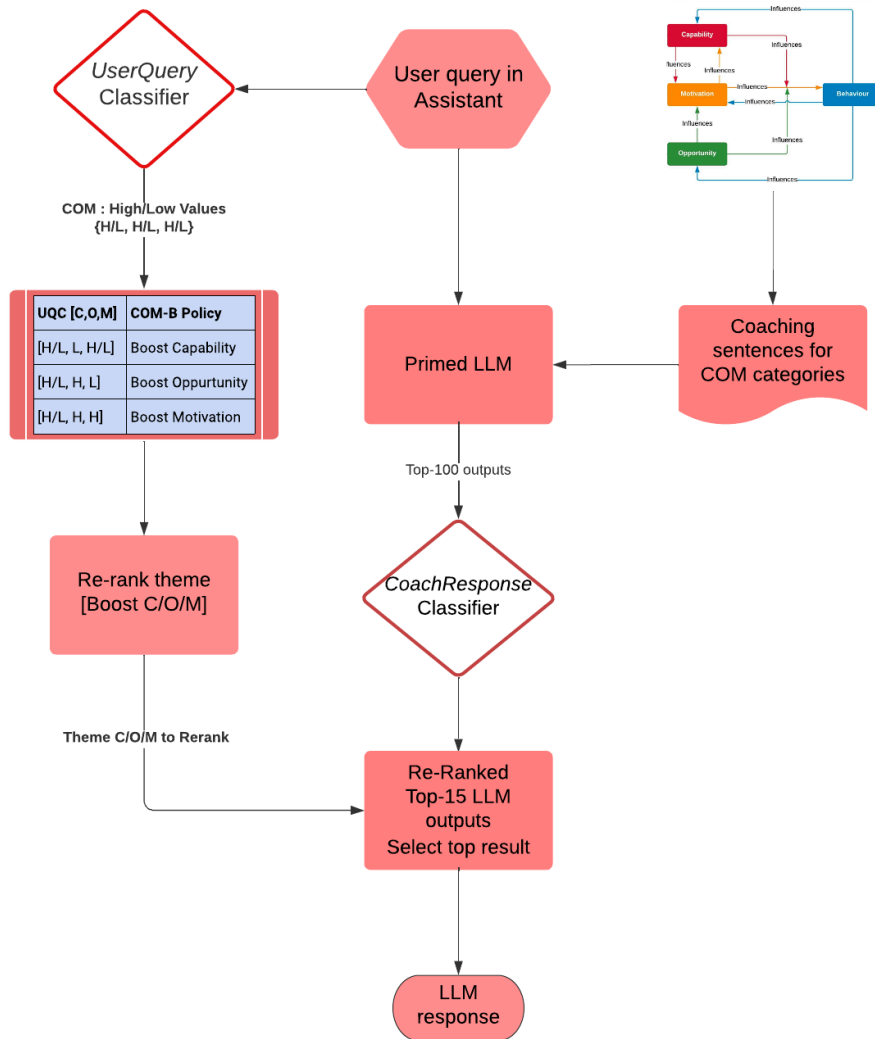

S2 Fig: Priming and BeSci infusion to LLM framework pipeline in Fit-LLM for user query input
